# Supplementary material for: BTBD10 inhibits glioma tumorigenesis by downregulating cyclin D1 and p-Akt
Source: publisher site journal article supplement (doi:10.1515/biol-2022-0103), 2022-01-01
Supplement: Supplementary file [file biol-2022-0103_sm.pdf]

# Supplementary material

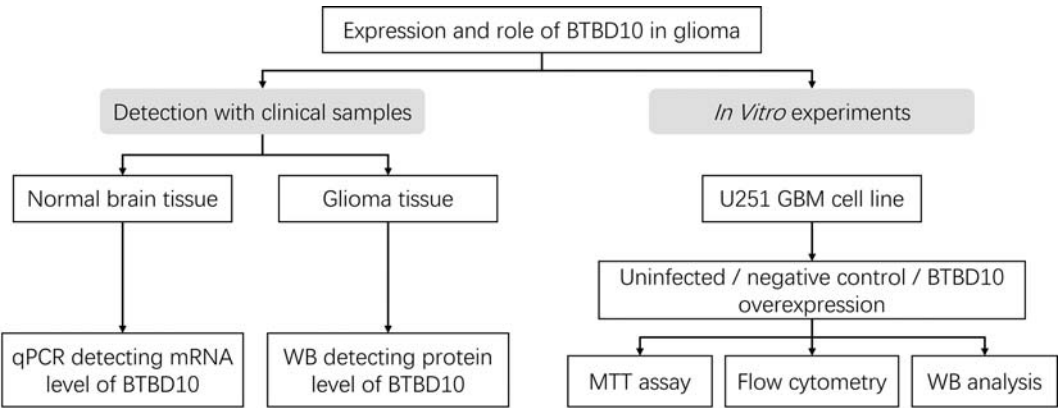

Figure S1: Schematic diagram of the study workflow.

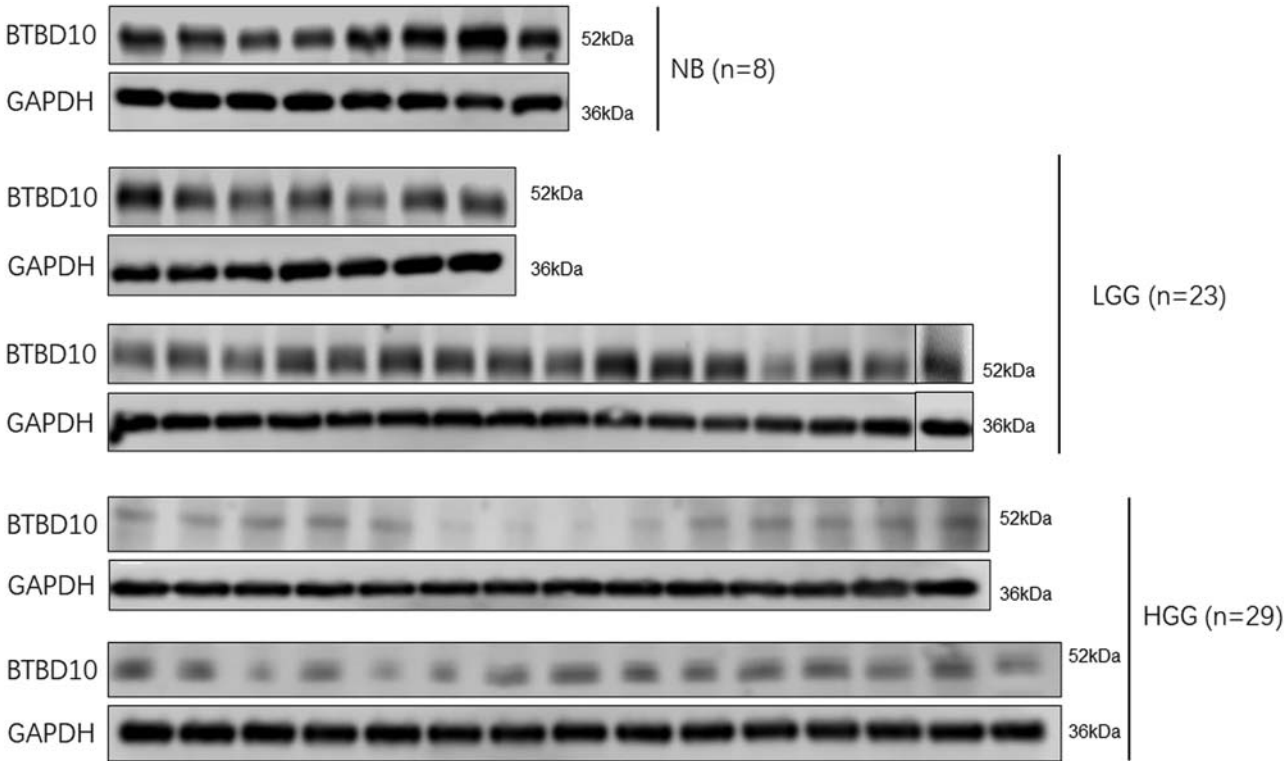

Figure S2: The protein expression of BTBD10 in all patients.

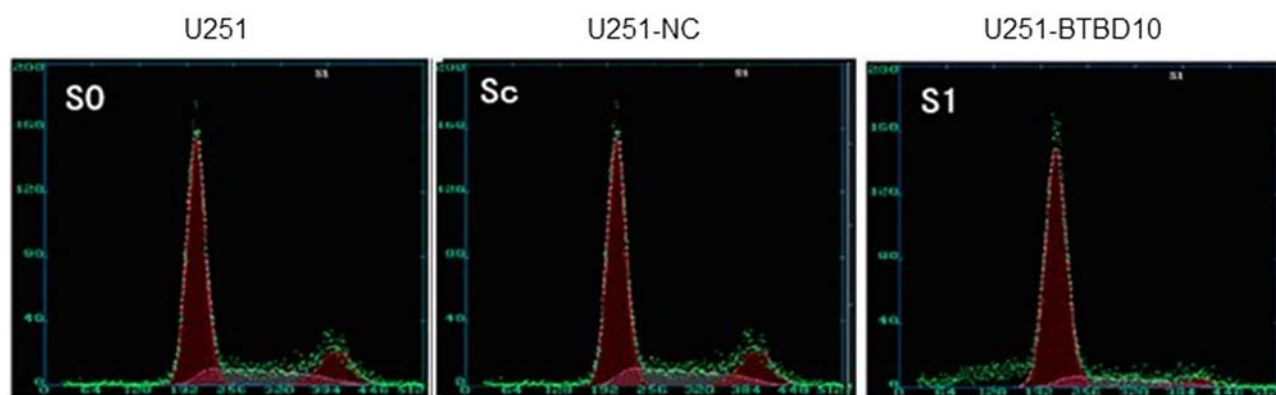

**Figure S3:** Original representative images for flow cytometry.
